# Supplementary material for: Transcriptomic Studies Suggest a Coincident Role for Apoptosis and Pyroptosis but Not for Autophagic Neuronal Death in TBEV-Infected Human Neuronal/Glial Cells
Source: MDPI journal article supplement (doi:10.3390/v13112255), 2021-11-10
Supplement: s1 [file s1]

Supplementary Materials: The following are available online at [www.mdpi.com/xxx/s1](http://www.mdpi.com/xxx/s1), Table S1: Primers pairs used for qRT-PCR analyses. Table S2: TBEV-induced differential expression of apoptotic genes in human neuronal/glial cells. Table S3: TBEV-induced differential expression of autophagic genes in human neuronal/glial cells.

**Table S1.** Primers pairs used for qRT-PCR analyses.

| Gene name        | 3' primer                   | 5' primer                     | Origin                                                                         |
|------------------|-----------------------------|-------------------------------|--------------------------------------------------------------------------------|
| <i>AIM2</i>      | GCTGCAC-<br>CAAAAGTCTCTCCTC | CTGCTTGCCTTCTT-<br>GGGTCTCA   | Retrieve from<br><a href="https://www.origene.com">https://www.origene.com</a> |
| <i>ATG3</i>      | ACATGGCAATGGGC-<br>TACAGG   | CTGTTTGCAC-<br>CGCTTATAGCA    | Yu et al. 2018                                                                 |
| <i>BECN1</i>     | ACCTCAGCCGAA-<br>GACTGAAG   | AACAGCGTTTGTAG-<br>TTCTGACA   | Sharma et al. 2011                                                             |
| <i>CASP1</i>     | TTTCCG-<br>CAAGGTTTCGATTTC  | GGCATCTGCGCTCTAC-<br>CATC     | Liu et al. 2018                                                                |
| <i>GSDMD</i>     | GGTTCG-<br>GAAACCCCGTTAT    | CCAGGTGTTAGGGTCCAC<br>AC      | Designed * from Acc.<br>No NM 024736.7                                         |
| <i>HPRT1</i>     | GGACTAATTATGGACA<br>GGACT   | GCTCTTCAGTCTGA-<br>TAAAATCTAC | Fares et al. 2020                                                              |
| <i>TNFSF10</i>   | AGCAATGCCACTTTT-<br>GGAGT   | TTCACAGTGCTCCTG-<br>CAGTC     | Lu et al. 2018                                                                 |
| <i>TNF</i>       | AGATGATCTGACTGCCT<br>GGG    | TGCTT-<br>GTTCTCAGCCTCTT      | Melchjorsen et al.<br>2010                                                     |
| <i>TNFRSF1A</i>  | GAGAGGCCA-<br>TAGCTGTCTGG   | GTTCTTTGTGGCACTT-<br>GGT      | Designed * from Acc.<br>No NM 001065.4                                         |
| <i>TNFRSF10A</i> | AGAGAGAAGTCCCTG-<br>CACCA   | GTCCTCCAGGGCG-<br>TACAAT      | Designed * from Acc.<br>No NM 003844.4                                         |
| <i>TNFRSF10B</i> | TGCAGCCGTAGTCTT-<br>GATTG   | TCCTG-<br>GACTTCCATTTCCTG     | Designed * from Acc.<br>No NM 003842.5                                         |

\*Designed using primer designer from the website: <https://www.bioinformatics.nl/cgi-bin/primer3plus/primer3plus.cgi>.

**Table S2.** TBEV-induced differential expression of apoptotic genes in human neuronal/glial cells. (PCR array data, 72hpi). Up- and down-regulated genes (threshold of 3) are indicated in bold and underscored.

| Gene symbol           | Ct    |       | Fold Change         |
|-----------------------|-------|-------|---------------------|
|                       | NI    | TBEV  |                     |
| ABL1                  | 35    | 35    | 1.18                |
| AIFM1                 | 28.62 | 28.43 | 1.35                |
| AKT1                  | 25.03 | 25.57 | -1.23               |
| APAF1                 | 26.75 | 27.73 | -1.67               |
| BAD                   | 26.45 | 27.26 | -1.48               |
| BAG1                  | 29.99 | 30.53 | -1.23               |
| BAG3                  | 28.67 | 28.83 | 1.06                |
| BAK1                  | 28.57 | 29.22 | -1.33               |
| BAX                   | 25.49 | 25.47 | 1.2                 |
| BCL10                 | 26.7  | 26.64 | 1.23                |
| BCL2                  | 27.93 | 28.5  | -1.26               |
| <b><u>BCL2A1</u></b>  | 35    | 31.65 | <b><u>12.04</u></b> |
| BCL2L1                | 27.07 | 27.77 | -1.38               |
| <b><u>BCL2L10</u></b> | 35    | 33.16 | <b><u>4.23</u></b>  |
| BCL2L11               | 29.39 | 28.92 | 1.64                |
| BCL2L2                | 26.36 | 27.02 | -1.34               |

|               |       |       |              |
|---------------|-------|-------|--------------|
| BFAR          | 26.15 | 26.31 | 1.06         |
| BID           | 27.35 | 27.71 | −1.09        |
| BIK           | 31.33 | 31.96 | −1.31        |
| BIRC2         | 25.08 | 25.13 | 1.14         |
| <b>BIRC3</b>  | 32.62 | 28.83 | <b>16.34</b> |
| BIRC5         | 30.28 | 31.45 | −1.91        |
| BIRC6         | 25.79 | 25.95 | 1.06         |
| BNIP2         | 25.94 | 26.47 | −1.22        |
| BNIP3         | 24.93 | 25.47 | −1.23        |
| BNIP3L        | 24.57 | 25.51 | −1.62        |
| BRAF          | 28.18 | 28.98 | −1.47        |
| <b>CASP1</b>  | 30.98 | 26.03 | <b>36.5</b>  |
| CASP10        | 33.21 | 32.91 | 1.45         |
| <b>CASP14</b> | 35    | 33.58 | <b>3.16</b>  |
| CASP2         | 26.32 | 27.37 | −1.75        |
| CASP3         | 25.66 | 26.48 | −1.49        |
| <b>CASP4</b>  | 33.78 | 30.89 | <b>8.75</b>  |
| <b>CASP5</b>  | 35    | 32.93 | <b>4.96</b>  |
| CASP6         | 26.59 | 27.56 | −1.66        |
| CASP7         | 28.63 | 27.49 | 2.6          |
| <b>CASP8</b>  | 31.78 | 29.47 | <b>5.86</b>  |
| CASP9         | 26.72 | 27.64 | −1.6         |
| CD27          | 33.21 | 33.36 | 1.06         |
| <b>CD40</b>   | 35    | 32.59 | <b>6.28</b>  |
| CD40LG        | 32.25 | 33.14 | −1.57        |
| <b>CD70</b>   | 34.53 | 32.46 | <b>4.96</b>  |
| CFLAR         | 27.01 | 27.15 | 1.07         |
| CIDEA         | 35    | 33.73 | 2.85         |
| CIDEB         | 26.93 | 27.38 | −1.16        |
| <b>CRADD</b>  | 28.99 | 31.15 | <b>−3.78</b> |
| CYCS          | 29.07 | 29.62 | −1.24        |
| DAPK1         | 27.59 | 28.71 | −1.84        |
| DFFA          | 26.9  | 27.75 | −1.53        |
| DIABLO        | 26.34 | 26.7  | −1.09        |
| FADD          | 27.24 | 27.27 | 1.16         |
| FAS           | 26.84 | 26.22 | 1.82         |
| FASLG         | 35    | 35    | 1.18         |
| GADD45A       | 29.29 | 27.97 | 2.95         |
| <b>HRK</b>    | 29.66 | 27.26 | <b>6.23</b>  |
| IGF1R         | 25.66 | 26.93 | −2.04        |
| IL10          | 34.75 | 35    | −1.01        |
| LTA           | 32.4  | 31.26 | 2.6          |
| LTBR          | 35    | 35    | 1.18         |
| MCL1          | 24.06 | 23.93 | 1.29         |
| NAIP          | 24.29 | 25.39 | −1.82        |
| NFKB1         | 29.12 | 28.14 | 2.33         |
| NOD1          | 28.48 | 28    | 1.65         |
| NOL3          | 28.81 | 29.65 | −1.52        |
| PYCARD        | 30.45 | 30.25 | 1.36         |
| RIPK2         | 28.66 | 28.65 | 1.19         |
| <b>TNF</b>    | 35    | 32.17 | <b>8.4</b>   |
| TNFRSF10A     | 33.8  | 33.3  | 1.67         |
| TNFRSF10B     | 26.71 | 25.92 | 2.04         |
| TNFRSF11B     | 28.86 | 29.21 | −1.08        |

|                        |       |       |                      |
|------------------------|-------|-------|----------------------|
| TNFRSF1A               | 26.1  | 26.25 | 1.06                 |
| <b><u>TNFRSF1B</u></b> | 35    | 32.89 | <b><u>5.1</u></b>    |
| TNFRSF21               | 27.95 | 27.89 | 1.23                 |
| TNFRSF25               | 28.63 | 29.61 | −1.67                |
| <b><u>TNFRSF9</u></b>  | 35    | 31.9  | <b><u>10.13</u></b>  |
| <b><u>TNFSF10</u></b>  | 34.31 | 27.85 | <b><u>103.97</u></b> |
| TNFSF8                 | 35    | 35    | 1.18                 |
| TP53                   | 25.32 | 25.17 | 1.31                 |
| TP53BP2                | 25.29 | 25.99 | −1.38                |
| TP73                   | 35    | 35    | 1.18                 |
| TRADD                  | 31.55 | 32.49 | −1.62                |
| TRAF2                  | 28.13 | 28.2  | 1.13                 |
| TRAF3                  | 27.69 | 27.92 | 1.01                 |
| XIAP                   | 25.84 | 26.64 | −1.47                |

**Table S3.** TBEV-induced differential expression of autophagic genes in human neuronal/glia cells. (PCR array data, 72hpi). Up- and down-regulated genes (threshold of 3) are indicated in bold and underscored.

| Gene symbol         | Ct    |       | Fold Regulation    |
|---------------------|-------|-------|--------------------|
|                     | NI    | TBEV  |                    |
| AKT1                | 35.00 | 35.00 | −1.48              |
| AMBRA1              | 27.75 | 26.62 | 1.48               |
| APP                 | 23.53 | 23.42 | −1.37              |
| ATG10               | 28.97 | 28.98 | −1.49              |
| ATG12               | 25.70 | 25.41 | −1.21              |
| ATG16L1             | 27.63 | 26.99 | 1.05               |
| ATG16L2             | 29.24 | 29.05 | −1.30              |
| ATG3                | 25.60 | 25.37 | −1.26              |
| ATG4A               | 28.43 | 28.53 | −1.59              |
| ATG4B               | 26.51 | 26.13 | −1.14              |
| ATG4C               | 26.74 | 27.24 | −2.09              |
| ATG4D               | 27.73 | 27.27 | −1.08              |
| ATG5                | 26.23 | 26.02 | −1.28              |
| ATG7                | 27.15 | 27.02 | −1.35              |
| ATG9A               | 27.94 | 27.37 | 1.00               |
| ATG9B               | 34.59 | 33.01 | 2.02               |
| BAD                 | 27.05 | 26.54 | −1.04              |
| BAK1                | 28.85 | 28.13 | 1.11               |
| BAX                 | 25.87 | 24.97 | 1.26               |
| BCL2                | 28.03 | 27.82 | −1.28              |
| BCL2L1              | 27.78 | 27.43 | −1.16              |
| BECN1               | 27.21 | 26.79 | −1.11              |
| BID                 | 27.47 | 26.92 | −1.01              |
| BNIP3               | 25.00 | 24.99 | −1.47              |
| CASP3               | 25.79 | 25.97 | −1.68              |
| <b><u>CASP8</u></b> | 31.46 | 29.08 | <b><u>3.52</u></b> |
| CDKN1B              | 25.11 | 24.04 | 1.42               |
| CDKN2A              | 28.67 | 27.69 | 1.33               |
| CLN3                | 27.60 | 27.39 | −1.28              |
| CTSB                | 25.67 | 25.65 | −1.46              |
| CTSD                | 25.46 | 24.90 | −1.00              |
| <b><u>CTSS</u></b>  | 31.86 | 28.58 | <b><u>6.56</u></b> |
| CXCR4               | 25.17 | 25.46 | −1.81              |
| DAPK1               | 28.14 | 28.19 | −1.53              |

|           |       |       |        |
|-----------|-------|-------|--------|
| DRAM1     | 29.74 | 27.74 | 2.70   |
| DRAM2     | 26.72 | 26.70 | −1.46  |
| EIF2AK3   | 27.75 | 26.11 | 2.11   |
| EIF4G1    | 26.11 | 25.08 | 1.38   |
| ESR1      | 34.41 | 34.76 | −1.89  |
| FADD      | 27.86 | 26.76 | 1.45   |
| FAS       | 26.83 | 25.47 | 1.73   |
| GAA       | 27.41 | 27.09 | −1.19  |
| GABARAP   | 23.33 | 23.27 | −1.42  |
| GABARAPL1 | 26.73 | 26.36 | −1.15  |
| GABARAPL2 | 23.58 | 23.79 | −1.71  |
| HDAC1     | 26.23 | 26.14 | −1.39  |
| HDAC6     | 26.37 | 26.03 | −1.17  |
| HGS       | 28.95 | 28.14 | 1.18   |
| HSP90AA1  | 23.35 | 22.57 | 1.16   |
| HSPA8     | 22.27 | 21.82 | −1.08  |
| HTT       | 27.47 | 26.85 | 1.04   |
| IFNG      | 35.00 | 35.00 | −1.48  |
| IGF1      | 33.50 | 30.86 | 4.21   |
| INS       | 35.00 | 35.00 | −1.48  |
| IRGM      | 35.00 | 35.00 | −1.48  |
| LAMP1     | 24.81 | 24.45 | −1.15  |
| MAP1LC3A  | 26.55 | 26.50 | −1.43  |
| MAP1LC3B  | 24.48 | 24.46 | −1.46  |
| MAPK14    | 26.70 | 26.39 | −1.19  |
| MAPK8     | 24.95 | 25.54 | −2.23  |
| MTOR      | 26.60 | 26.21 | −1.13  |
| NFKB1     | 29.38 | 27.05 | 3.40   |
| NPC1      | 27.70 | 27.11 | 1.02   |
| PIK3C3    | 25.97 | 25.82 | −1.33  |
| PIK3CG    | 35.00 | 35.00 | −1.48  |
| PIK3R4    | 27.56 | 27.21 | −1.16  |
| PRKAA1    | 25.96 | 25.80 | −1.33  |
| PTEN      | 25.26 | 24.79 | −1.07  |
| RAB24     | 30.11 | 29.05 | 1.41   |
| RB1       | 25.66 | 25.41 | −1.24  |
| RGS19     | 29.85 | 29.02 | 1.20   |
| RPS6KB1   | 26.14 | 25.82 | −1.19  |
| SNCA      | 26.65 | 27.10 | −2.02  |
| SQSTM1    | 24.30 | 23.02 | 1.64   |
| TGFB1     | 27.78 | 27.41 | −1.15  |
| TGM2      | 33.49 | 30.85 | 4.21   |
| TMEM74    | 32.20 | 30.06 | 2.98   |
| TNF       | 34.53 | 31.45 | 5.71   |
| TNFSF10   | 35.00 | 27.31 | 139.49 |
| TP53      | 25.48 | 24.49 | 1.34   |
| ULK1      | 27.85 | 27.87 | −1.50  |
| ULK2      | 26.26 | 26.27 | −1.49  |
| UVRAG     | 29.14 | 27.63 | 1.92   |
| WIPI1     | 27.87 | 27.81 | −1.42  |
